# Supplementary material for: Modulation of drug activation profiles through carboxylate ligand modification in cytotoxic trans-platinum planar amine compounds
Source: Royal Society of Chemistry journal article supplement (doi:10.1039/c1dt10964b), 2011-01-01
Supplement: c1dt10964b.pdf [file c1dt10964b.pdf]

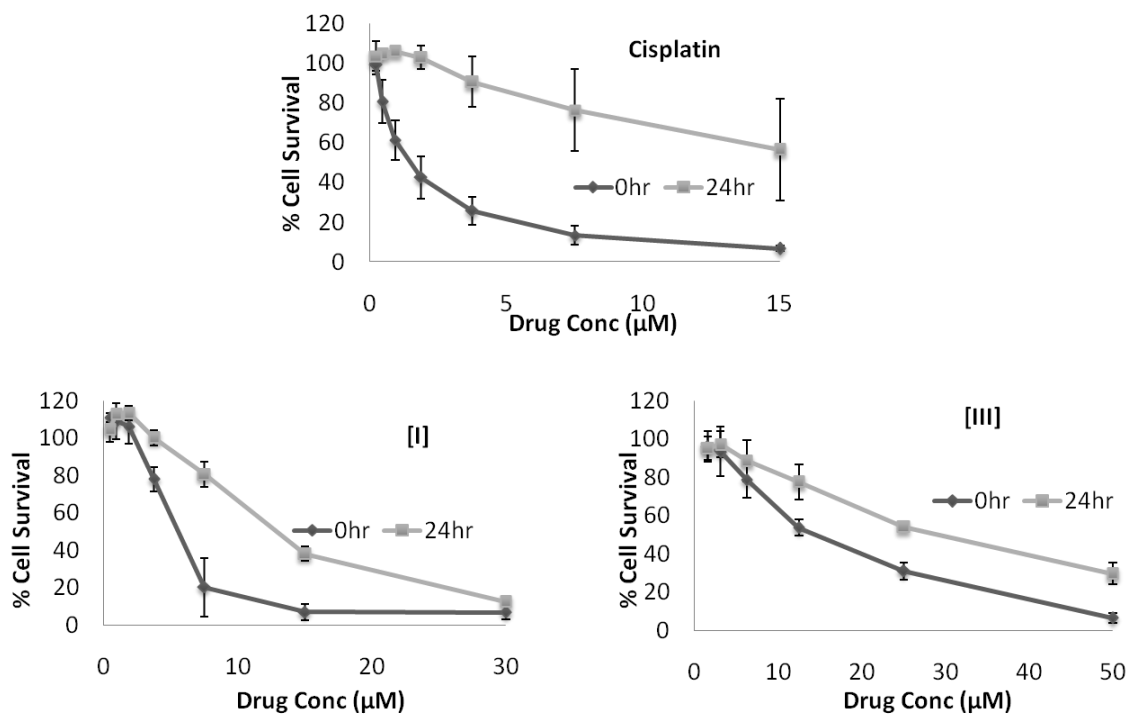

**Figure S1.** MTT Cell Survival Data of the effects of serum binding on efficacy of trans-platinum compounds in A2780 ovarian carcinoma cells.
